# Supplementary material
Source: Springer Nature journal article supplement (https://www.springermedizin.de/resource/supplementary/12885_2011_2920_MOESM2_ESM.pdf/9462302)
Supplement: MOESM2 [file 9462302]

Patients for elective colonoscopy  
Participating centers (n=3)

Invitation through telephone

Tests sent by mail

Additional FIT for double sampling

1st stoolsample  
(t = -2 days)

Baseline FIT = single FIT

2nd stoolsample  
(t = -1 day)

Bowel Lavage

Colonoscopy  
t = 0
